# Supplementary material for: Disruptor: Computational identification of oncogenic mutants disrupting protein-protein and protein-DNA interactions
Source: PubMed Central journal article supplement (PMC10344873; doi:10.1038/s42003-023-05089-2), 2023-07-13
Supplement: 42003_2023_5089_MOESM1_ESM.pdf [file 42003_2023_5089_MOESM1_ESM.pdf]

## Supplementary information

### Disruptor: Computational identification of oncogenic mutants disrupting protein-protein and protein-DNA interactions

Valentina Kugler,<sup>1</sup> Andreas Lieb,<sup>2</sup> Nathan Guerin,<sup>3</sup> Bruce R. Donald,<sup>3,4,5, 6</sup> Eduard Stefan,<sup>1,7,8</sup> Teresa Kaserer<sup>9\*</sup>

<sup>1</sup> Institute of Biochemistry and Center for Molecular Biosciences, University of Innsbruck, Innsbruck, Austria

<sup>2</sup> Institute of Pharmacology, Medical University of Innsbruck, Innsbruck, Austria

<sup>3</sup> Department of Computer Science, Duke University, Durham, USA

<sup>4</sup> Department of Biochemistry, Duke University Medical Center, Durham, USA

<sup>5</sup> Department of Chemistry, Duke University, Durham, USA

<sup>6</sup> Department of Mathematics, Duke University, Durham, USA

<sup>7</sup> Tyrolean Cancer Research Institute (TKFI), Innrain 66, 6020 Innsbruck, Austria.

<sup>8</sup> Institute of Molecular Biology, University of Innsbruck, Innsbruck, Austria

<sup>9</sup> Institute of Pharmacy / Pharmaceutical Chemistry, University of Innsbruck, Innsbruck, Austria

\* Corresponding author: [teresa.kaserer@uibk.ac.at](mailto:teresa.kaserer@uibk.ac.at)

**Supplementary Table 1.** Prioritized hotspot mutations for p53 chain A predicted to disrupt interactions DNA consensus sequence.

| wt residue <sup>1</sup> | mutant | K*(Log <sub>10</sub> ) | ΔK* (Log <sub>10</sub> ) score <sup>2</sup> | COSMIC <sup>3</sup> |
|-------------------------|--------|------------------------|---------------------------------------------|---------------------|
| K101                    | A      | 2,34299                | -3,852917                                   | -                   |
| K101                    | N      | 2,383493               | -3,812414                                   | 1                   |
| K101                    | D      | -0,10607               | -6,301977                                   | -                   |
| K101                    | Q      | 2,541033               | -3,654874                                   | -                   |
| K101                    | E      | -0,281937              | -6,477844                                   | -                   |
| K101                    | G      | 2,329185               | -3,866722                                   | -                   |
| K101                    | H      | 2,408996               | -3,786911                                   | -                   |
| K101                    | I      | 2,385238               | -3,810669                                   | -                   |
| K101                    | L      | 2,422414               | -3,773493                                   | -                   |
| K101                    | M      | 2,432355               | -3,763552                                   | -                   |
| K101                    | P      | 2,347536               | -3,848371                                   | -                   |
| K101                    | S      | 2,365646               | -3,830261                                   | -                   |
| K101                    | T      | 2,40944                | -3,786467                                   | -                   |
| K101                    | Y      | 2,590051               | -3,605856                                   | -                   |
| K101                    | V      | 2,376722               | -3,819185                                   | -                   |
| R249                    | A      | 0,517047               | -3,879753                                   | -                   |
| R249                    | N      | 0,321083               | -4,075717                                   | -                   |
| R249                    | C      | 0,476555               | -3,920245                                   | -                   |
| R249                    | Q      | 1,173259               | -3,223541                                   | -                   |
| R249                    | E      | -3,828045              | -8,224845                                   | -                   |
| R249                    | G      | 0,477414               | -3,919386                                   | 68                  |
| R249                    | I      | 0,674289               | -3,722511                                   | 1                   |
| R249                    | L      | 0,816013               | -3,580787                                   | -                   |
| R249                    | M      | 0,707806               | -3,688994                                   | 78                  |
| R249                    | P      | none                   | X                                           | -                   |
| R249                    | S      | 0,573587               | -3,823213                                   | 609                 |
| R249                    | T      | 0,448275               | -3,948525                                   | 5046                |
| R249                    | W      | 1,102095               | -3,294705                                   | 61                  |
| R249                    | V      | 0,629113               | -3,767687                                   | 1                   |
| R248                    | A      | 0,203102               | -4,698122                                   | -                   |
| R248                    | C      | 0,321923               | -4,579301                                   | 1                   |
| R248                    | Q      | 0,431464               | -4,46976                                    | 1520                |
| R248                    | E      | -3,03584               | -7,937064                                   | -                   |
| R248                    | G      | 0,181438               | -4,719786                                   | 36                  |
| R248                    | H      | 0,37264                | -4,528584                                   | 1                   |
| R248                    | I      | 0,288149               | -4,613075                                   | -                   |
| R248                    | M      | 0,307344               | -4,59388                                    | -                   |

|      |   |          |           |      |
|------|---|----------|-----------|------|
| R248 | P | none     | X         | 40   |
| R248 | S | 0,298687 | -4,602537 | -    |
| R248 | T | 0,077249 | -4,823975 | -    |
| R248 | W | 0,351411 | -4,549813 | 1193 |
| R248 | V | 0,265969 | -4,635255 | -    |

<sup>1</sup> wildtype residue, <sup>2</sup>difference of K\* score of mutant in relation to wt residue, <sup>3</sup> number of patient samples harboring the mutant reported in COSMIC, none... no binding at all was predicted for the mutant, X... thus no difference of the K\* score to the wt could be calculated.

**Supplementary Table 2.** Prioritized hotspot mutations for p53 chain B predicted to disrupt interactions DNA consensus sequence.

| wt residue <sup>1</sup> | mutant | K*(Log <sub>10</sub> ) | ΔK* (Log <sub>10</sub> ) score <sup>2</sup> | COSMIC <sup>3</sup> |
|-------------------------|--------|------------------------|---------------------------------------------|---------------------|
| K120                    | A      | 2,691146               | -11,188792                                  | -                   |
| K120                    | N      | 4,108135               | -9,771803                                   | 3                   |
| K120                    | D      | -4,373352              | -18,25329                                   | -                   |
| K120                    | Q      | 5,186083               | -8,693855                                   | 1                   |
| K120                    | E      | -4,313321              | -18,193259                                  | 21                  |
| K120                    | G      | 1,991899               | -11,888039                                  | -                   |
| K120                    | H      | -10,93979              | -24,819728                                  | -                   |
| K120                    | I      | -7,360472              | -21,24041                                   | -                   |
| K120                    | L      | 4,388371               | -9,491567                                   | -                   |
| K120                    | M      | 4,931815               | -8,948123                                   | 10                  |
| K120                    | P      | none                   | X                                           | -                   |
| K120                    | S      | 2,930995               | -10,948943                                  | -                   |
| K120                    | T      | 3,46453                | -10,415408                                  | 3                   |
| K120                    | W      | none                   | X                                           | -                   |
| K120                    | Y      | none                   | X                                           | -                   |
| K120                    | V      | 4,020949               | -9,858989                                   | -                   |
| R273                    | A      | 10,016722              | -7,825299                                   | -                   |
| R273                    | N      | 10,008983              | -7,833038                                   | -                   |
| R273                    | D      | 5,055741               | -12,78628                                   | -                   |
| R273                    | C      | 9,978956               | -7,863065                                   | 1379                |
| R273                    | Q      | 10,768056              | -7,073965                                   | 2                   |
| R273                    | G      | 9,989578               | -7,852443                                   | 27                  |
| R273                    | H      | 10,095936              | -7,746085                                   | 1406                |
| R273                    | I      | 10,197308              | -7,644713                                   | -                   |
| R273                    | L      | 10,283987              | -7,558034                                   | 278                 |
| R273                    | F      | 11,116865              | -6,725156                                   | -                   |
| R273                    | P      | none                   | X                                           | 56                  |
| R273                    | S      | 9,967608               | -7,874413                                   | 43                  |
| R273                    | T      | 10,105834              | -7,736187                                   | -                   |
| R273                    | W      | 11,407796              | -6,434225                                   | -                   |
| R273                    | Y      | 11,329325              | -6,512696                                   | 1                   |
| R273                    | V      | 10,108209              | -7,733812                                   | -                   |
| R283                    | A      | 0,606024               | -4,514618                                   | -                   |
| R283                    | N      | 0,89169                | -4,228952                                   | -                   |
| R283                    | D      | -2,922849              | -8,043491                                   | -                   |
| R283                    | C      | 0,706364               | -4,414278                                   | 37                  |
| R283                    | Q      | 0,555647               | -4,564995                                   | -                   |

|      |   |          |           |    |
|------|---|----------|-----------|----|
| R283 | G | 0,590585 | -4,530057 | 3  |
| R283 | H | 0,742676 | -4,377966 | 23 |
| R283 | I | 0,695116 | -4,425526 | -  |
| R283 | L | 0,669899 | -4,450743 | 4  |
| R283 | F | 0,658977 | -4,461665 | -  |
| R283 | P | none     | X         | 56 |
| R283 | S | 0,630511 | -4,490131 | 1  |
| R283 | T | 0,638687 | -4,481955 | -  |
| R283 | W | 0,647427 | -4,473215 | -  |
| R283 | Y | 0,670915 | -4,449727 | -  |
| R283 | V | 0,65277  | -4,467872 | -  |

<sup>1</sup> wildtype residue, <sup>2</sup> difference of K\* score of mutant in relation to wt residue, <sup>3</sup> number of patient samples harboring the mutant reported in COSMIC, none... no binding at all was predicted for the mutant, X... thus no difference of the K\* score to the wt could be calculated.

**Supplementary Table 3.** Prioritized hotspot mutations for p53 chain C predicted to disrupt interactions DNA consensus sequence.

| wt residue <sup>1</sup> | mutant | K*(Log <sub>10</sub> ) | ΔK* (Log <sub>10</sub> ) score <sup>2</sup> | COSMIC <sup>3</sup> |
|-------------------------|--------|------------------------|---------------------------------------------|---------------------|
| K120                    | A      | 1,815678               | -6,933418                                   | -                   |
| K120                    | N      | 2,775805               | -5,973291                                   | 3                   |
| K120                    | D      | -3,462315              | -12,211411                                  | -                   |
| K120                    | Q      | 2,493117               | -6,255979                                   | 1                   |
| K120                    | E      | -3,730755              | -12,479851                                  | 21                  |
| K120                    | G      | 1,873719               | -6,875377                                   | -                   |
| K120                    | H      | 3,06706                | -5,682036                                   | -                   |
| K120                    | I      | -39,45776              | -48,206856                                  | -                   |
| K120                    | L      | 2,954455               | -5,794641                                   | -                   |
| K120                    | M      | 3,706782               | -5,042314                                   | 10                  |
| K120                    | P      | 2,544973               | -6,204123                                   | -                   |
| K120                    | S      | 2,16749                | -6,581606                                   | -                   |
| K120                    | T      | -19,04392              | -27,793016                                  | 3                   |
| K120                    | W      | 4,1289                 | -4,620196                                   | -                   |
| K120                    | Y      | 3,522574               | -5,226522                                   | -                   |
| K120                    | V      | -56,05519              | -64,804286                                  | -                   |
| R280                    | A      | -2,73018               | -4,932897                                   | -                   |
| R280                    | N      | -2,896371              | -5,099088                                   | -                   |
| R280                    | C      | -2,602158              | -4,804875                                   | -                   |
| R280                    | Q      | -2,396227              | -4,598944                                   | -                   |
| R280                    | E      | -7,085311              | -9,288028                                   | -                   |
| R280                    | G      | -2,799111              | -5,001828                                   | 78                  |
| R280                    | I      | -2,419549              | -4,622266                                   | 50                  |
| R280                    | L      | -2,313941              | -4,516658                                   | -                   |
| R280                    | M      | -2,239468              | -4,442185                                   | -                   |
| R280                    | P      | -2,619168              | -4,821885                                   | -                   |
| R280                    | S      | -2,751042              | -4,953759                                   | 39                  |
| R280                    | T      | -2,635841              | -4,838558                                   | 174                 |
| R280                    | W      | -1,659759              | -3,862476                                   | -                   |
| R280                    | V      | -2,540043              | -4,74276                                    | -                   |
| R248                    | A      | 1,724592               | -3,233005                                   | -                   |
| R248                    | C      | 1,856652               | -3,100945                                   | 1                   |
| R248                    | Q      | 1,727043               | -3,230554                                   | 1520                |
| R248                    | E      | -1,084808              | -6,042405                                   | -                   |
| R248                    | G      | 1,556304               | -3,401293                                   | 36                  |
| R248                    | H      | 1,888048               | -3,069549                                   | 1                   |
| R248                    | L      | -2,518818              | -7,476415                                   | 159                 |

|      |   |           |           |      |
|------|---|-----------|-----------|------|
| R248 | P | none      | X         | 40   |
| R248 | S | 1,737028  | -3,220569 | -    |
| R248 | W | -0,814039 | -5,771636 | 1193 |

<sup>1</sup> wildtype residue, <sup>2</sup> difference of K\* score of mutant in relation to wt residue, <sup>3</sup> number of patient samples harboring the mutant reported in COSMIC, none... no binding at all was predicted for the mutant, X... thus no difference of the K\* score to the wt could be calculated.

**Supplementary Table 4.** Prioritized hotspot mutations for p53 predicted to disrupt interactions with ASPP2. Please note that four residue positions are reported, because an equal number of individual mutations was predicted for residues 248,249, 280.

| wt residue <sup>1</sup> | mutant | K*(Log <sub>10</sub> ) | ΔK* (Log <sub>10</sub> ) score <sup>2</sup> | COSMIC <sup>3</sup> |
|-------------------------|--------|------------------------|---------------------------------------------|---------------------|
| R273                    | A      | 0,323495               | -4,932792                                   | -                   |
| R273                    | N      | 0,269833               | -4,986454                                   | -                   |
| R273                    | D      | -2,454937              | -7,711224                                   | -                   |
| R273                    | C      | 0,277161               | -4,979126                                   | 1379                |
| R273                    | Q      | 0,661741               | -4,594546                                   | 2                   |
| R273                    | G      | 0,309248               | -4,947039                                   | 27                  |
| R273                    | H      | 0,239307               | -5,01698                                    | 1406                |
| R273                    | I      | 0,346589               | -4,909698                                   | -                   |
| R273                    | L      | 0,363471               | -4,892816                                   | 278                 |
| R273                    | F      | 0,560962               | -4,695325                                   | -                   |
| R273                    | P      | none                   | X                                           | 56                  |
| R273                    | S      | 0,295117               | -4,96117                                    | 43                  |
| R273                    | T      | 0,351097               | -4,90519                                    | -                   |
| R273                    | W      | 0,891786               | -4,364501                                   | -                   |
| R273                    | Y      | 0,535113               | -4,721174                                   | 1                   |
| R273                    | V      | 0,343263               | -4,913024                                   | -                   |
| R248                    | A      | 5,193638               | -4,511186                                   | -                   |
| R248                    | C      | 6,215555               | -13,489269                                  | 1                   |
| R248                    | Q      | 3,323453               | -16,381371                                  | 1520                |
| R248                    | E      | -3,524651              | -23,229475                                  | -                   |
| R248                    | G      | 5,141793               | -14,563031                                  | 36                  |
| R248                    | H      | 3,29916                | -16,405664                                  | 1                   |
| R248                    | L      | 3,921772               | -15,783052                                  | 159                 |
| R248                    | K      | 14,533442              | -5,171382                                   | -                   |
| R248                    | M      | 7,055204               | -12,64962                                   | -                   |
| R248                    | P      | none                   | X                                           | 40                  |
| R248                    | S      | 5,490434               | -14,21439                                   | -                   |
| R248                    | T      | -15,45115              | -35,155974                                  | -                   |
| R248                    | W      | -33,78764              | -53,492464                                  | 1193                |
| R248                    | V      | 6,466922               | -13,237902                                  | -                   |
| R249                    | A      | 15,437851              | -4,266973                                   | -                   |
| R249                    | N      | 14,964978              | -4,739846                                   | -                   |
| R249                    | C      | 15,689048              | -4,015776                                   | -                   |
| R249                    | Q      | 13,903387              | -5,801437                                   | -                   |
| R249                    | E      | 10,255063              | -9,449761                                   | -                   |
| R249                    | G      | 15,266362              | -4,438462                                   | 68                  |



|      |   |           |            |     |
|------|---|-----------|------------|-----|
| R249 | I | 16,043865 | -3,660959  | 1   |
| R249 | L | 6,003125  | -13,701699 | -   |
| R249 | M | 16,406264 | -3,29856   | 78  |
| R249 | P | none      | X          | -   |
| R249 | S | 15,557841 | -4,146983  | 609 |
| R249 | T | 15,519187 | -4,185637  | 50  |
| R249 | W | none      | X          | 61  |
| R249 | V | 16,015213 | -3,689611  | 1   |
| R280 | A | 0,475741  | -5,638805  | -   |
| R280 | N | 0,825332  | -5,289214  | -   |
| R280 | C | 0,533749  | -5,580797  | -   |
| R280 | Q | 0,634461  | -5,480085  | -   |
| R280 | E | -1,778061 | -7,892607  | -   |
| R280 | G | 0,453977  | -5,660569  | 78  |
| R280 | I | 0,56953   | -5,545016  | 50  |
| R280 | L | 0,645035  | -5,469511  | -   |
| R280 | M | 0,837309  | -5,277237  | -   |
| R280 | P | none      | X          | -   |
| R280 | S | 0,539367  | -5,575179  | 39  |
| R280 | T | 0,58243   | -5,532116  | 174 |
| R280 | W | 1,116796  | -4,99775   | -   |
| R280 | V | 0,546488  | -5,568058  | -   |

<sup>1</sup> wildtype residue, <sup>2</sup>difference of K\* score of mutant in relation to wt residue, <sup>3</sup> number of patient samples harboring the mutant reported in COSMIC, none... no binding at all was predicted for the mutant, X... thus no difference of the K\* score to the wt could be calculated.

**Supplementary Table 5.** Prioritized hotspot mutations for ERK2 predicted to disrupt interactions with DUSP6.

| wt residue <sup>1</sup> | mutant | K*(Log <sub>10</sub> ) | ΔK* (Log <sub>10</sub> ) score <sup>2</sup> | Pb <sup>3</sup> colorectal cancer | Pb <sup>3</sup> cervical cancer | COSMIC <sup>4</sup> |
|-------------------------|--------|------------------------|---------------------------------------------|-----------------------------------|---------------------------------|---------------------|
| D321                    | N      | -1,182303              | -8,764402                                   | 0,00402124                        | 0,00646836                      | 8                   |
| D321                    | H      | -14,64852              | -22,230619                                  | 0,00096405                        | 0,00477121                      | -                   |
| D321                    | Y      | None <sup>5</sup>      | X <sup>6</sup>                              | 0,00128344                        | 0,00352652                      | 1                   |
| D321                    | G      | 0,123075               | -7,459024                                   | 0,00604358                        | 0,00298779                      | 2                   |
| D321                    | V      | 0,346748               | -7,235351                                   | 0,00064382                        | 0,00246853                      | 1                   |
| D321                    | A      | 0,272173               | -7,309926                                   | 0,00091117                        | 0,00146627                      | 1                   |
| D321                    | E      | -4,191007              | -11,773106                                  | 0,00042221                        | 0,00142358                      | 1                   |
| D321                    | S      | -0,208939              | -7,791038                                   | 2,4673E-05                        | 2,3709E-05                      | -                   |
| D321                    | I      | -3,383509              | -10,965608                                  | 2,5077E-06                        | 1,5454E-05                      | -                   |
| D321                    | R      | -12,0264               | -19,608499                                  | 5,6435E-06                        | 1,3797E-05                      | -                   |
| D321                    | L      | -16,51716              | -24,099259                                  | 6,012E-07                         | 1,1399E-05                      | -                   |
| D321                    | C      | 0,639544               | -6,942555                                   | 7,5132E-06                        | 1,0198E-05                      | -                   |
| D321                    | T      | -3,179452              | -10,761551                                  | 3,5491E-06                        | 9,1792E-06                      | -                   |
| D321                    | K      | -9,397628              | -16,979727                                  | 1,6713E-06                        | 9,0652E-06                      | -                   |
| D321                    | F      | none                   | X                                           | 8,0038E-07                        | 8,4253E-06                      | -                   |
| D321                    | P      | none                   | X                                           | 8,5085E-07                        | 6,7708E-06                      | -                   |
| D321                    | Q      | -4,940341              | -12,52244                                   | 4,0068E-07                        | 6,6867E-06                      | -                   |
| D318                    | N      | -0,212286              | -4,309833                                   | 0,00999477                        | 0,02316461                      | 1                   |
| D318                    | H      | 0,930958               | -3,166589                                   | 0,00011049                        | 0,00341755                      | -                   |
| D318                    | G      | 0,648646               | -3,448901                                   | 0,00457925                        | 0,00240737                      | -                   |
| D318                    | Y      | 0,909629               | -3,187918                                   | 0,00067654                        | 0,00231833                      | -                   |
| D318                    | V      | 0,788937               | -3,30861                                    | 0,00065276                        | 0,00130214                      | -                   |
| D318                    | A      | 0,693979               | -3,403568                                   | 0,00025986                        | 0,00047436                      | -                   |
| D318                    | K      | -1,872717              | -5,970264                                   | 2,3788E-05                        | 0,00018536                      | -                   |
| D318                    | S      | 0,647953               | -3,449594                                   | 4,5487E-05                        | 5,5821E-05                      | -                   |
| D318                    | I      | -0,010491              | -4,108038                                   | 6,4592E-06                        | 0,00002961                      | -                   |
| D318                    | Q      | 0,52897                | -3,568577                                   | 2,6297E-07                        | 2,7347E-05                      | -                   |
| D318                    | T      | 0,960081               | -3,137466                                   | 2,5714E-06                        | 1,0787E-05                      | -                   |
| D318                    | R      | -2,143087              | -6,240634                                   | 5,0092E-07                        | 8,0762E-06                      | -                   |
| D318                    | C      | 0,418232               | -3,679315                                   | 3,0672E-06                        | 5,4786E-06                      | -                   |
| D318                    | L      | -2,06998               | -6,167527                                   | 7,1404E-08                        | 4,3684E-06                      | -                   |
| D318                    | F      | 1,005684               | -3,091863                                   | 4,3722E-07                        | 2,9633E-06                      | -                   |
| D318                    | P      | none                   | X                                           | 2,8426E-08                        | 1,5914E-06                      | -                   |
| E81                     | K      | -0,356733              | -5,721186                                   | 0,00397595                        | 0,00679256                      | 5                   |
| E81                     | Q      | 2,323264               | -3,041189                                   | 0,00095319                        | 0,00501034                      | -                   |
| E81                     | G      | 1,556504               | -3,807949                                   | 0,00561014                        | 0,0035114                       | -                   |

|     |   |          |           |            |            |   |
|-----|---|----------|-----------|------------|------------|---|
| E81 | V | 1,735473 | -3,62898  | 0,00093775 | 0,00209152 | - |
| E81 | A | 1,59246  | -3,771993 | 0,00070536 | 0,001344   | - |
| E81 | N | 1,803066 | -3,561387 | 2,7476E-05 | 0,000647   | - |
| E81 | H | 2,091465 | -3,272988 | 6,5871E-06 | 0,00047724 | - |
| E81 | Y | 2,151015 | -3,213438 | 8,7695E-06 | 0,00035274 | - |
| E81 | R | 0,386516 | -4,977937 | 2,7223E-05 | 3,3257E-05 | - |
| E81 | L | 2,071127 | -3,293326 | 2,0514E-06 | 1,4624E-05 | - |
| E81 | W | 2,223596 | -3,140857 | 7,0083E-06 | 1,0435E-05 | - |
| E81 | T | 1,724047 | -3,640406 | 2,7608E-06 | 7,3257E-06 | - |
| E81 | P | 1,603678 | -3,760775 | 6,6187E-07 | 5,4036E-06 | - |
| E81 | S | 1,64994  | -3,714513 | 8,8115E-07 | 3,9939E-06 | - |

<sup>1</sup> wildtype residue, <sup>2</sup>difference of K\* score of mutant in relation to wt residue, <sup>3</sup> Pb relative Probability for a mutation to be formed in the indicated cancer type, <sup>4</sup> number of patient samples harboring the mutant reported in COSMIC, none... no binding at all was predicted for the mutant, X... thus no difference of the K\* score to the wt could be calculated.

**Supplementary Table 6.** Prioritized hotspot mutations for p16 predicted to disrupt interactions with CDK6. Please note that four residue positions are reported, because an equal number of individual mutations was predicted for residues G23, G55, G89.

| wt residue <sup>1</sup> | mutant | K*(Log <sub>10</sub> ) | ΔK* (Log <sub>10</sub> ) score <sup>2</sup> | Pb <sup>3</sup> melanoma | COSMIC <sup>4</sup> |
|-------------------------|--------|------------------------|---------------------------------------------|--------------------------|---------------------|
| D84                     | A      | 0,705794               | -4,822505                                   | 5,1003E-05               | 1                   |
| D84                     | R      | none                   | X                                           | 4,9293E-05               | -                   |
| D84                     | N      | 0,267755               | -5,260544                                   | 0,07688685               | 37                  |
| D84                     | C      | 1,413534               | -4,114765                                   | 2,2295E-07               | -                   |
| D84                     | Q      | -12,0721               | -17,600399                                  | 4,3045E-08               | -                   |
| D84                     | E      | -9,249456              | -14,777755                                  | 0,00015851               | -                   |
| D84                     | G      | 0,330964               | -5,197335                                   | 0,00064395               | 15                  |
| D84                     | H      | none                   | X                                           | 0,00027263               | 2                   |
| D84                     | I      | none                   | X                                           | 1,3085E-05               | -                   |
| D84                     | L      | -57,34838              | -62,876679                                  | 4,6397E-08               | -                   |
| D84                     | K      | -39,35921              | -44,887509                                  | 1,214E-05                | -                   |
| D84                     | F      | none                   | X                                           | 5,9392E-08               | -                   |
| D84                     | P      | none                   | X                                           | 1,3794E-08               | -                   |
| D84                     | S      | 1,151568               | -4,376731                                   | 4,9137E-05               | -                   |
| D84                     | T      | 1,457733               | -4,070566                                   | 3,8903E-06               | -                   |
| D84                     | Y      | none                   | X                                           | 0,00034898               | 33                  |
| D84                     | V      | none                   | X                                           | 0,00017154               | 6                   |
| G23                     | A      | none                   | X                                           | 0,00024447               | -                   |
| G23                     | R      | none                   | X                                           | 0,00049361               | 2                   |
| G23                     | N      | none                   | X                                           | 0,00125316               | -                   |
| G23                     | D      | none                   | X                                           | 0,01622997               | 2                   |
| G23                     | C      | none                   | X                                           | 0,00073695               | 1                   |
| G23                     | E      | none                   | X                                           | 3,595E-06                | -                   |
| G23                     | H      | none                   | X                                           | 7,7217E-06               | -                   |
| G23                     | I      | none                   | X                                           | 6,9919E-05               | -                   |
| G23                     | L      | none                   | X                                           | 4,3083E-07               | -                   |
| G23                     | F      | none                   | X                                           | 6,6648E-07               | -                   |
| G23                     | P      | none                   | X                                           | 1,1628E-07               | -                   |
| G23                     | S      | none                   | X                                           | 0,07731202               | 6                   |
| G23                     | T      | none                   | X                                           | 1,8872E-05               | -                   |
| G23                     | W      | none                   | X                                           | 3,741E-08                | -                   |
| G23                     | Y      | none                   | X                                           | 1,1945E-05               | -                   |
| G23                     | V      | none                   | X                                           | 0,00090574               | 5                   |
| G55                     | A      | none                   | X                                           | 6,096E-07                | -                   |
| G55                     | R      | none                   | X                                           | 0,00057867               | 3                   |
| G55                     | N      | none                   | X                                           | 0,00136281               | -                   |

|     |   |      |   |            |   |
|-----|---|------|---|------------|---|
| G55 | D | none | X | 0,01766393 | 2 |
| G55 | C | none | X | 0,00073753 | 1 |
| G55 | E | none | X | 2,3125E-05 | - |
| G55 | H | none | X | 8,3974E-06 | - |
| G55 | I | none | X | 3,5426E-05 | - |
| G55 | L | none | X | 2,1829E-07 | - |
| G55 | F | none | X | 3,3769E-07 | - |
| G55 | P | none | X | 2,2125E-07 | - |
| G55 | S | none | X | 0,07737281 | - |
| G55 | T | none | X | 3,5907E-05 | - |
| G55 | W | none | X | 9,5684E-08 | - |
| G55 | Y | none | X | 1,2991E-05 | - |
| G55 | V | none | X | 0,00045977 | 3 |
| G89 | A | none | X | 0,00047142 | - |
| G89 | R | none | X | 0,00053999 | - |
| G89 | N | none | X | 0,00136281 | - |
| G89 | D | none | X | 0,01787906 | 1 |
| G89 | C | none | X | 0,00074651 | 2 |
| G89 | E | none | X | 1,3031E-05 | - |
| G89 | H | none | X | 8,3974E-06 | - |
| G89 | I | none | X | 3,5426E-05 | - |
| G89 | L | none | X | 2,1829E-07 | - |
| G89 | F | none | X | 3,3769E-07 | - |
| G89 | P | none | X | 2,2125E-07 | - |
| G89 | S | none | X | 0,07831512 | 6 |
| G89 | T | none | X | 3,5907E-05 | - |
| G89 | W | none | X | 1,4967E-07 | - |
| G89 | Y | none | X | 1,2991E-05 | - |
| G89 | V | none | X | 0,0004651  | 2 |

<sup>1</sup> wildtype residue, <sup>2</sup> difference of K\* score of mutant in relation to wt residue, <sup>3</sup> Pb relative Probability for a mutation to be formed in the indicated cancer type, <sup>4</sup> number of patient samples harboring the mutant reported in COSMIC, none... no binding at all was predicted for the mutant, X... thus no difference of the K\* score to the wt could be calculated.

**Supplementary Table 7.** Prioritized hotspot mutations for CDK6 predicted to disrupt interactions with p16. Please note that four residue positions are reported, because an equal number of individual mutations was predicted for residues G37 and R31, G20 and K111.

| wt residue <sup>1</sup> | mutant | K*(Log <sub>10</sub> ) | ΔK* (Log <sub>10</sub> ) score <sup>2</sup> | COSMIC <sup>3</sup> |
|-------------------------|--------|------------------------|---------------------------------------------|---------------------|
| G37                     | A      | none                   | X                                           |                     |
| G37                     | R      | none                   | X                                           |                     |
| G37                     | N      | none                   | X                                           |                     |
| G37                     | D      | none                   | X                                           |                     |
| G37                     | C      | none                   | X                                           |                     |
| G37                     | E      | none                   | X                                           |                     |
| G37                     | H      | none                   | X                                           |                     |
| G37                     | I      | none                   | X                                           |                     |
| G37                     | L      | none                   | X                                           |                     |
| G37                     | F      | none                   | X                                           |                     |
| G37                     | P      | none                   | X                                           |                     |
| G37                     | S      | none                   | X                                           |                     |
| G37                     | T      | none                   | X                                           |                     |
| G37                     | W      | none                   | X                                           |                     |
| G37                     | Y      | none                   | X                                           |                     |
| G37                     | V      | none                   | X                                           |                     |
| R31                     | A      | 0.798177               | -5.643494                                   |                     |
| R31                     | N      | 1.248857               | -5.192814                                   |                     |
| R31                     | D      | -1.09348               | -7.535152                                   |                     |
| R31                     | C      | 1.339103               | -5.102568                                   |                     |
| R31                     | Q      | 0.164235               | -6.277436                                   |                     |
| R31                     | G      | 0.394287               | -6.047384                                   |                     |
| R31                     | H      | 2.442278               | -3.999393                                   |                     |
| R31                     | I      | none                   | X                                           |                     |
| R31                     | L      | -3.61789               | -10.059558                                  |                     |
| R31                     | F      | none                   | X                                           |                     |
| R31                     | P      | none                   | X                                           |                     |
| R31                     | S      | 0.799319               | -5.642352                                   |                     |
| R31                     | T      | 1.403068               | -5.038603                                   |                     |
| R31                     | W      | none                   | X                                           |                     |
| R31                     | Y      | none                   | X                                           |                     |
| R31                     | V      | 1.606236               | -4.835435                                   |                     |
| G20                     | A      | none                   | X                                           |                     |
| G20                     | R      | none                   | X                                           |                     |
| G20                     | D      | none                   | X                                           |                     |
| G20                     | C      | none                   | X                                           |                     |

|      |   |           |            |  |
|------|---|-----------|------------|--|
| G20  | Q | none      | X          |  |
| G20  | E | none      | X          |  |
| G20  | L | none      | X          |  |
| G20  | K | none      | X          |  |
| G20  | M | none      | X          |  |
| G20  | P | none      | X          |  |
| G20  | S | none      | X          |  |
| G20  | T | none      | X          |  |
| G20  | W | none      | X          |  |
| G20  | V | none      | X          |  |
| K111 | A | 1.493153  | -4.234931  |  |
| K111 | D | -0.173548 | -5.901632  |  |
| K111 | Q | 2.712797  | -3.015287  |  |
| K111 | E | 0.421897  | -5.306187  |  |
| K111 | G | 1.310223  | -4.417861  |  |
| K111 | H | -66.34503 | -72.073114 |  |
| K111 | I | -10.72942 | -16.457504 |  |
| K111 | L | 1.606365  | -4.121719  |  |
| K111 | M | 1.894562  | -3.833522  |  |
| K111 | P | none      | X          |  |
| K111 | S | 1.558725  | -4.169359  |  |
| K111 | T | 1.949978  | -3.778106  |  |
| K111 | Y | none      | X          |  |
| K111 | V | 2.363409  | -3.364675  |  |

<sup>1</sup> wildtype residue, <sup>2</sup>difference of K\* score of mutant in relation to wt residue, <sup>3</sup> number of patient samples harboring the mutant reported in COSMIC, none... no binding at all was predicted for the mutant, X... thus no difference of the K\* score to the wt could be calculated.

**Supplementary Table 8.** Prioritized hotspot mutations for smad4 predicted to disrupt interactions with smad2. Please note that five residue positions are reported, because an equal number of individual mutations was predicted for residues 361, 365, 428, 507.

| wt residue <sup>1</sup> | mutant | K*(Log <sub>10</sub> ) | ΔK* (Log <sub>10</sub> ) score <sup>2</sup> | Pb <sup>3</sup> colorectal | COSMIC <sup>4</sup> |
|-------------------------|--------|------------------------|---------------------------------------------|----------------------------|---------------------|
| D537                    | A      | 4.582058               | -4.821045                                   | 0.00026246                 | 4                   |
| D537                    | R      | none                   | X                                           | 5.2273E-06                 |                     |
| D537                    | N      | 4.470593               | -4.93251                                    | 0.00448332                 |                     |
| D537                    | C      | 4.884818               | -4.518285                                   | 2.6362E-05                 |                     |
| D537                    | Q      | -24.48158              | -33.884683                                  | 4.8495E-07                 |                     |
| D537                    | E      | 2.371261               | -7.031842                                   | 0.00042221                 | 7                   |
| D537                    | G      | 3.761375               | -5.641728                                   | 0.00462508                 | 20                  |
| D537                    | H      | none                   | X                                           | 0.00116682                 | 6                   |
| D537                    | I      | none                   | X                                           | 2.8631E-06                 |                     |
| D537                    | L      | none                   | X                                           | 7.4514E-07                 |                     |
| D537                    | K      | none                   | X                                           | 1.8634E-06                 |                     |
| D537                    | F      | none                   | X                                           | 3.7578E-06                 |                     |
| D537                    | P      | none                   | X                                           | 2.9663E-07                 |                     |
| D537                    | S      | 4.739755               | -4.663348                                   | 2.1581E-05                 |                     |
| D537                    | T      | 2.886855               | -6.516248                                   | 1.1398E-06                 |                     |
| D537                    | Y      | none                   | X                                           | 0.00588437                 | 29                  |
| D537                    | V      | -19.50471              | -28.907813                                  | 0.00065929                 | 14                  |
| R361                    | A      | 0.974539               | -4.772984                                   | 2.8985E-09                 |                     |
| R361                    | N      | 1.028212               | -4.719311                                   | 1.118E-05                  |                     |
| R361                    | D      | 0.266894               | -5.480629                                   | 1.8259E-06                 |                     |
| R361                    | C      | 1.065402               | -4.682121                                   | 0.01002855                 | 167                 |
| R361                    | Q      | 0.886778               | -4.860745                                   | 4.1914E-05                 |                     |
| R361                    | G      | 0.959733               | -4.78779                                    | 0.00011114                 | 15                  |
| R361                    | H      | 1.062984               | -4.684539                                   | 0.01670801                 | 210                 |
| R361                    | I      | 1.070326               | -4.677197                                   | 2.5094E-07                 |                     |
| R361                    | L      | 1.089429               | -4.658094                                   | 0.00037596                 | 4                   |
| R361                    | F      | 1.023549               | -4.723974                                   | 2.659E-05                  |                     |
| R361                    | P      | none                   | X                                           | 0.00067909                 | 3                   |
| R361                    | S      | 0.976897               | -4.770626                                   | 0.00067909                 | 14                  |
| R361                    | T      | 0.988378               | -4.759145                                   | 1.7748E-08                 |                     |
| R361                    | W      | 1.545709               | -4.201814                                   | 6.2797E-06                 |                     |
| R361                    | Y      | 1.015874               | -4.731649                                   | 0.00016517                 |                     |
| R361                    | V      | 1.025202               | -4.722321                                   | 4.0982E-08                 |                     |
| G365                    | A      | none                   | X                                           | 0.00073185                 | 1                   |
| G365                    | R      | none                   | X                                           | 0.00042811                 | 1                   |
| G365                    | N      | none                   | X                                           | 1.4458E-05                 |                     |



|      |   |           |            |            |   |
|------|---|-----------|------------|------------|---|
| G365 | D | none      | X          | 0.00383563 | 5 |
| G365 | C | none      | X          | 0.00274886 |   |
| G365 | E | none      | X          | 3.4631E-06 |   |
| G365 | H | none      | X          | 1.6127E-06 |   |
| G365 | I | none      | X          | 6.2906E-06 |   |
| G365 | L | none      | X          | 7.0167E-07 |   |
| G365 | F | none      | X          | 4.5458E-06 |   |
| G365 | P | none      | X          | 3.0744E-07 |   |
| G365 | S | none      | X          | 0.0038059  | 4 |
| G365 | T | none      | X          | 2.7562E-06 |   |
| G365 | W | none      | X          | 7.0669E-07 |   |
| G365 | Y | none      | X          | 1.0448E-05 |   |
| G365 | V | none      | X          | 0.00167031 | 2 |
| K428 | A | 0.126469  | -6.547002  | 3.6755E-06 |   |
| K428 | N | 0.448996  | -6.224475  | 0.00694114 |   |
| K428 | D | -1.760524 | -8.433995  | 1.4012E-05 |   |
| K428 | Q | 0.903522  | -5.769949  | 0.00026279 |   |
| K428 | E | -2.886629 | -9.5601    | 0.00202761 |   |
| K428 | G | 0.102477  | -6.570994  | 1.3902E-05 |   |
| K428 | H | 0.183194  | -6.490277  | 1.8161E-06 |   |
| K428 | I | 0.333433  | -6.340038  | 1.1911E-05 |   |
| K428 | L | 0.411409  | -6.262062  | 2.7446E-07 |   |
| K428 | M | 0.175197  | -6.498274  | 0.00104902 |   |
| K428 | P | 0.158751  | -6.51472   | 4.7637E-07 |   |
| K428 | S | 0.14608   | -6.527391  | 4.927E-05  |   |
| K428 | T | 0.184828  | -6.488643  | 0.00184139 |   |
| K428 | W | 0.119359  | -6.554112  | 5.5573E-06 |   |
| K428 | Y | 0.147132  | -6.526339  | 5.6013E-06 |   |
| K428 | V | 0.196069  | -6.477402  | 2.1177E-06 |   |
| K507 | A | 2.539634  | -8.242713  | 9.6383E-06 |   |
| K507 | R | 5.220245  | -5.562102  | 0.00391035 |   |
| K507 | N | 2.963475  | -7.818872  | 0.00286974 | 4 |
| K507 | D | -1.696103 | -12.47845  | 1.2285E-05 |   |
| K507 | Q | 0.219739  | -10.562608 | 0.00073351 | 3 |
| K507 | E | -6.18591  | -16.968257 | 0.00431049 | 5 |
| K507 | G | 2.343533  | -8.438814  | 1.6626E-05 |   |
| K507 | H | 3.447321  | -7.335026  | 2.0906E-06 |   |
| K507 | I | none      | X          | 0.00096382 |   |
| K507 | L | none      | X          | 1.6549E-06 |   |
| K507 | M | 3.926115  | -6.856232  | 6.6185E-06 |   |
| K507 | P | none      | X          | 1.6401E-06 |   |
| K507 | S | 2.548982  | -8.233365  | 1.3382E-05 |   |

|      |   |          |           |            |  |
|------|---|----------|-----------|------------|--|
| K507 | T | 2.970434 | -7.811913 | 0.00227337 |  |
| K507 | Y | 4.805533 | -5.976814 | 2.8508E-06 |  |
| K507 | V | none     | X         | 4.1143E-06 |  |

<sup>1</sup> wildtype residue, <sup>2</sup>difference of K\* score of mutant in relation to wt residue, <sup>3</sup> Pb relative Probability for a mutation to be formed in the indicated cancer type, <sup>4</sup> number of patient samples harboring the mutant reported in COSMIC, none... no binding at all was predicted for the mutant, X... thus no difference of the K\* score to the wt could be calculated.

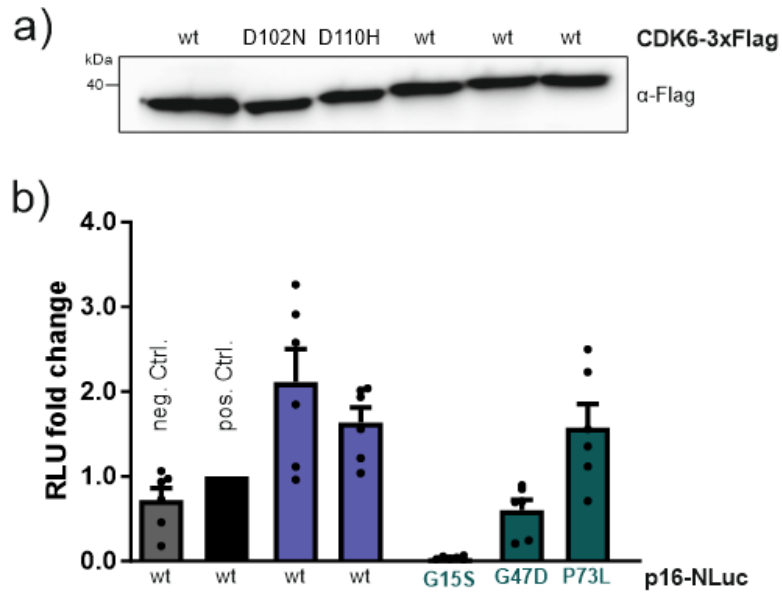

**Supplementary Figure 1. a)** Immunoblotting shows expression of Flag tagged CDK6 variants. **b)** Bioluminescence signals of 1% input samples of LUMIER experiments. Bars represent the luciferase intensities of p16-NLuc variants relative to the wild-type. Input signals were used for normalization of signals after immunoprecipitation. Error bars represent SEM with n = 6 experiments.

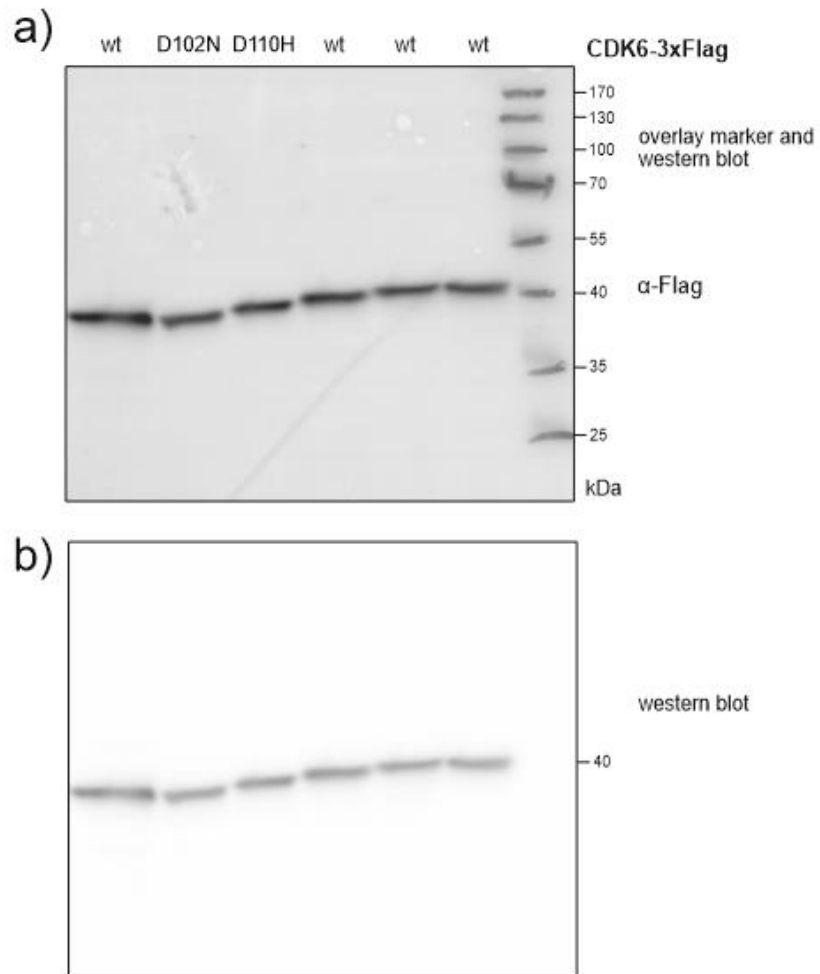

**Supplementary Figure 2.** a) Overlay of the used marker bands on the membrane with the detected western blot. b) Western blot of the whole uncut membrane is shown.
